# Supplementary material
Source: publisher figshare collection journal article supplement (https://frontiersin.figshare.com/ndownloader/files/26672306)

**Figure S4.** Final mass of *Leymus chinensis* (Lc) and *Phragmites australis* (Pa) in mixtures over time. M1, 30% Lc: 70% Pa; M2, 50% Lc: 50% Pa; and M3, 70% Lc: 30% Pa. Data are means  $\pm$  SEM ( $n=3$ ). Lowercase letters indicate significant difference ( $P < 0.05$ ) while *ns* indicates not significant ( $P > 0.05$ , Tukey's HSD test).

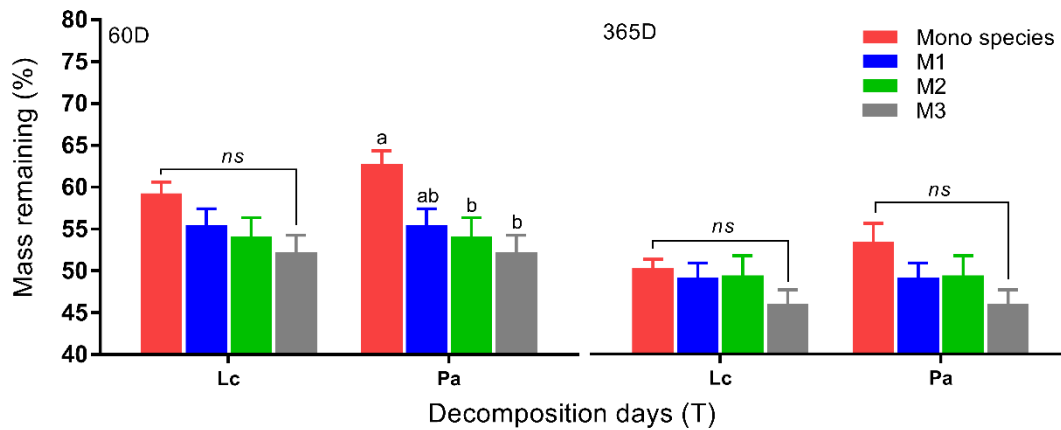

Supplement: Supplementary file 1 [file 26672306]
